# Supplementary material
Source: publisher figshare collection journal article supplement (https://rs.figshare.com/ndownloader/files/13764008)
Supplement: Supplementary file 1 [file 13764008]

## Sheet: Sheet1
State	Site	Dominant sp	Type	Tree C stock	Soil C stock
				tonC/ha	tonC/ha
Baja California Sur	Puerto Escondido	Rm	Fringe	303.937	277.762
		Rm	Fringe	77.6203	626.825
		Rm	Fringe	34.2046	280.419
		Rm	Fringe	47.6441	358.733
		Rm	Fringe	31.5709	666.042
	Conchalito	Rm	Fringe	62.5182	102.1
		Lr/Ag	Basin	262.483	451.8
		Ag	Scrub	281.507	281.2
		Ag	Scrub	43.4599	100.9
	Banderitas 1	Rm	Scrub	9.60793	44.1749
		Rm	Scrub	8.72964	92.0635
		Rm	Scrub	19.4244	129.47
		Rm	Fringe	43.888	74.4324
		Lr	Fringe	221.202
	Banderitas 2	Ag	Scrub	32.1432	35.1248
		Lr	Scrub	113.296	42.7636
		Lr	Basin	168.238	92.5944
		Lr/Rm	Fringe	446.492	106.26
	Coyote	Ag	Scrub	151.792	128.6
		Lr	Basin	86.9665	119.6
		Lr/Rm	Fringe	183.921	164.3
	Is Libertad	Lr	Fringe	91.4407	313.8
		Lr	Fringe	56.5537	330.2
		Lr	Fringe	69.2452	286.1
	Bahia Magdalena	Lr	Scrub	82.1
		Lr	Scrub	10.5
Sinaloa	Maviri	Rm	Scrub	7.58353
		Rm	Scrub	8.98057
		Ag	Scrub	6.04228
		Ag	Scrub	32.1091
	Sinaloa 1	Ag	Scrub		244.9
		Ag	Scrub		270.3
	Sinaloa 2	Ag	Scrub		114.8
		Ag	Scrub		128.2
Sonora	Huivulai	Lr	Fringe	11.7467	381
		Lr	Fringe	10.405
		Lr	Fringe	4.77768
		Lr	Fringe	5.75501
		Lr	Scrub	4.77768
		Lr	Scrub	5.75501
	Santa Cruz	Lr	Scrub	1.27011
		Lr	Scrub	1.28597
		Lr	Scrub	2.05212
		Lr	Scrub	4.48071
